# Supplementary material for: Specificity of Synaptic Connectivity between Layer 1 Inhibitory Interneurons and Layer 2/3 Pyramidal Neurons in the Rat Neocortex
Source: PubMed Central journal article supplement — Cereb Cortex. 2011 Jan 10;21(8):1818–26. doi: 10.1093/cercor/bhq257 (PMC3138515; doi:10.1093/cercor/bhq257), 2011-01-10

## Supplementary Information

Specificity of synaptic connectivity between layer 1 inhibitory interneurons  
and layer 2/3 pyramidal neurons in the rat neocortex

Christian Wozny<sup>1</sup> & Stephen R. Williams<sup>1,2</sup>

<sup>1</sup> MRC Laboratory of Molecular Biology,

Hills Road,

Cambridge

CB2 0QH, UK

Phone: +44 1223 252998

Fax: +44 1223 402310

<sup>2</sup> The Queensland Brain Institute

St Lucia, QLD 4072, Australia

Phone: +61 7 3346 6352

Fax: +61 7 3346 6301

Corresponding authors:

Stephen R. Williams      [srw@uq.edu.au](mailto:srw@uq.edu.au)

Christian Wozny          [cwozny@mrc-lmb.cam.ac.uk](mailto:cwozny@mrc-lmb.cam.ac.uk)

## Supplementary Figure 1

**A**, Reconstruction of a L2/3 pyramidal neuron. Please note axon collaterals in L1. **B**, Twenty L2/3 pyramidal neurons were randomly selected for further analysis of the intrinsic properties. **In line with previously published data (Larkum et al., 2007; Waters et al., 2003; Higgs and Spain, 2009)** L2/3 pyramidal neurons had an average resting membrane potential of  $-76.5 \pm 1.1$  mV and an input resistance of  $46 \pm 3$  M $\Omega$  and exhibited prominent rectification of the voltage – current relationship (Sutor and Zieglansberger, 1987). **C**, Averaged voltage-current relationship for twenty L2/3 pyramidal neurons. **D**, Action potential firing frequency plotted against number of action potentials (events), highlighting the presence of spike frequency accommodation (same neurons as shown in **A** and **B**).

## Supplementary Figure 2

**A**, NGFC showing anatomical characteristics of short dendrites and large and dense axonal arbor, which is in this case, confined to L1 (as were five of the twelve successfully stained cells). **B**, Example of c-AC neuron with one descending axon innervating deeper layers.

## Supplementary Figure 3

**A**, Confocal image of a simultaneously recorded L1 neuron and L2/3 pyramidal neuron. L1 interneuron closed to L1-L2 boarder was characterized as chandelier cell, exhibiting several hundred vertically oriented axonal segments (enlarged in **B**).

## Supplementary Figure 4

**A**, Relationship between action potential firing frequency and injected current (f-I) for all FS cells. The f-I of anatomically identified Chandelier cells are shown in bold (n = 4). **B**, Typical action potential firing pattern of a FS cell at the threshold from repetitive

firing. **C1** Threshold firing pattern of a Chandelier cell, note the Chandelier cell shows shuttering firing behavior. **C2** High-frequency firing of the same Chandelier cell evoked by a larger positive current step.

### **Supplementary Figure 5**

Bar diagram of the decay time constant of L2/3 Pyr-L1 uEPSPs. Significant differences indicated by stars (\*  $P < 0.05$ , \*\*\*  $P < 0.001$ ).

### **Supplementary Figure 6**

**A-C**, Bar diagram of the basic properties of L1-L2/3 Pyr uIPSPs. Depending on the presynaptic cell type, differences were observed in the latency (**A**), rise time (**B**), half width (**C**) of uIPSPs. Significant differences indicated by stars (\*  $P < 0.05$ , \*\*  $P < 0.01$ , \*\*\*  $P < 0.001$ ).

### **Supplementary Figure 7**

**A**, Chandelier cells selectively innervate the axon initial segment of a pyramidal neuron. Small arrows indicate putative synaptic boutons on the axon initial segment of the filled L2/3 pyramidal neuron, open arrows point to a neighboring axonal segment of the chandelier cell and the larger arrow indicates the first axonal branching point of the L2/3 axon. **B**, Synaptically coupled Chandelier cell (upper trace) to layer 2/3 pyramidal neuron (lower trace) pair. The histogram shows the tight latency distribution of uIPSPs. **C**, Synaptic responses are depolarizing at -62 mV, a potential at which, for example, NGFC-L2/3 pyramidal cell pairs showed hyperpolarizing uIPSPs (see Figure 7). Unitary IPSPs were blocked with GABA<sub>A</sub>-receptor antagonist SR 95531 (2  $\mu$ M).

### **Supplementary Figure 8**

**A**, Voltage – current relationship for two BS cells. **B**, Synaptically coupled BS-BS cell pair. **C**, Unitary IPSPs at different membrane potential reveal reversal potential close to estimated GABA reversal potential (-65 mV).

## References

1. Higgs MH, Spain WJ (2009) Conditional bursting enhances resonant firing in neocortical layer 2-3 pyramidal neurons. *J Neurosci* 29: 1285-1299.
2. Larkum ME, Waters J, Sakmann B, Helmchen F (2007) Dendritic spikes in apical dendrites of neocortical layer 2/3 pyramidal neurons. *J Neurosci* 27: 8999-9008.
3. Sutor B, Zieglansberger W (1987) A low-voltage activated, transient calcium current is responsible for the time-dependent depolarizing inward rectification of rat neocortical neurons in vitro. *Pflugers Arch* 410: 102-111.
4. Waters J, Larkum M, Sakmann B, Helmchen F (2003) Supralinear Ca<sup>2+</sup> influx into dendritic tufts of layer 2/3 neocortical pyramidal neurons in vitro and in vivo. *J Neurosci* 23: 8558-8567.

# Supplementary Figure 1

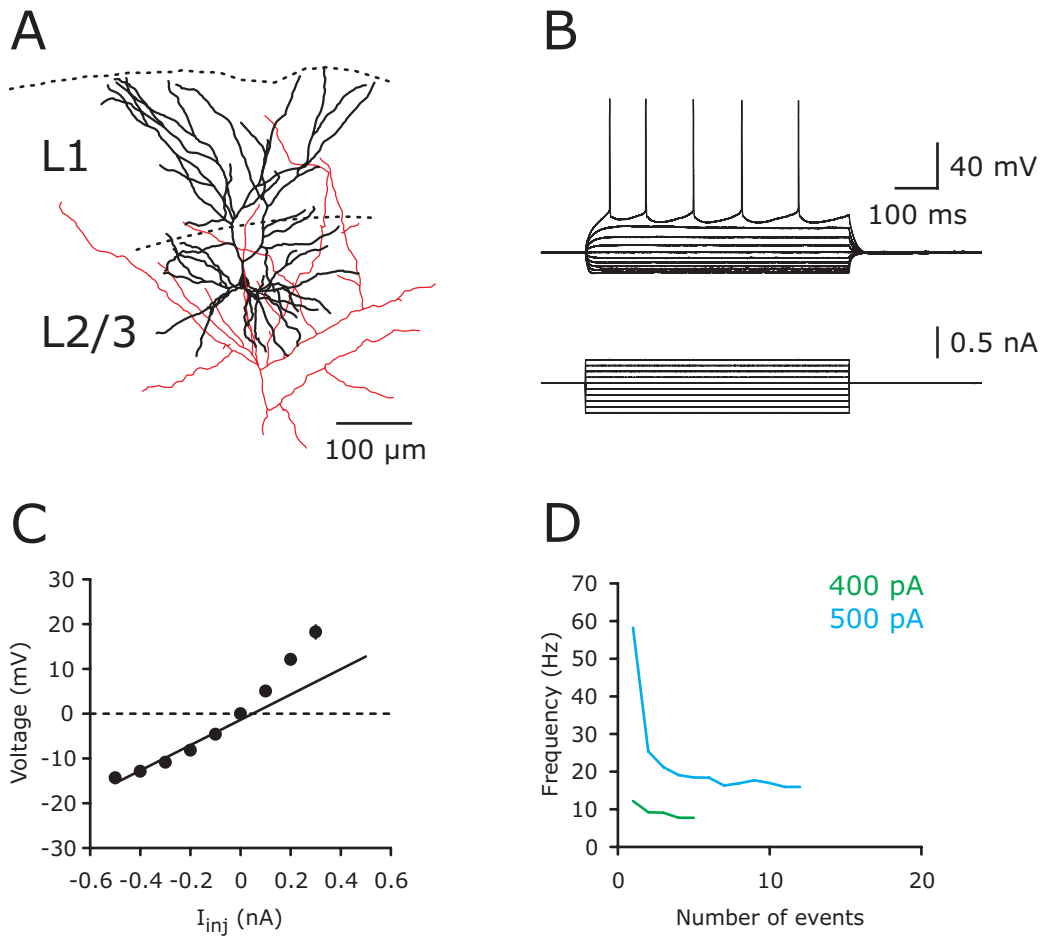

## Supplementary Figure 2

A

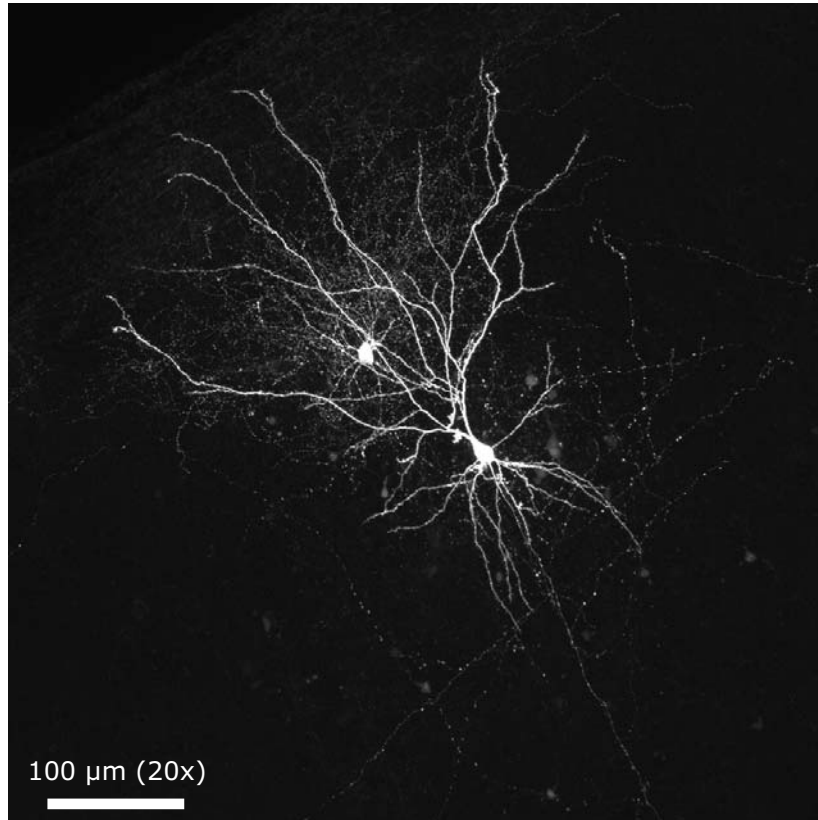

B

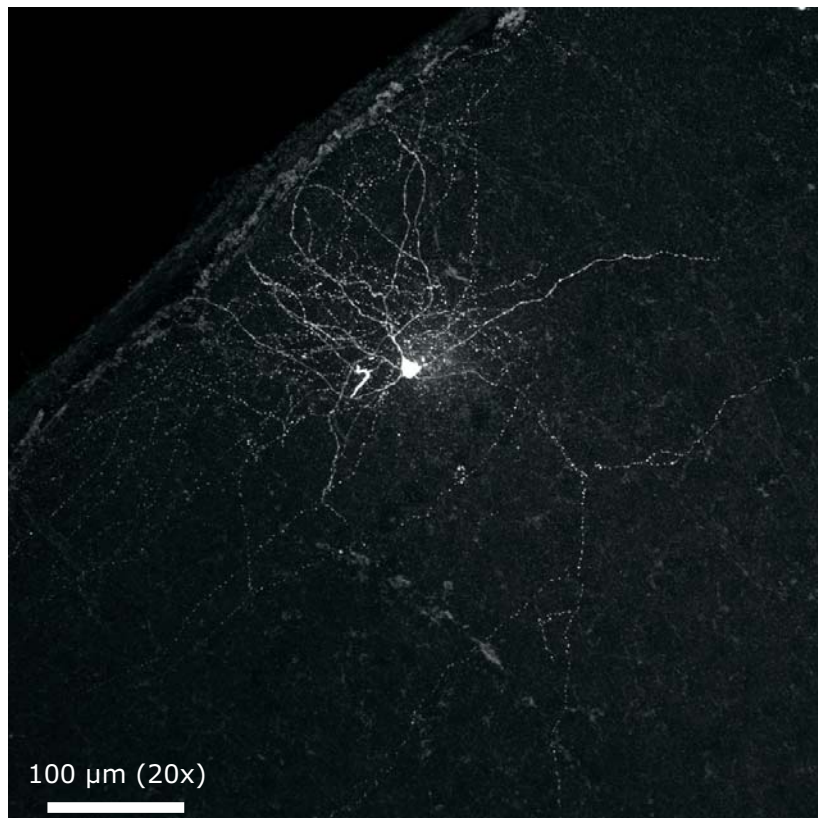

# Supplementary Figure 3

A

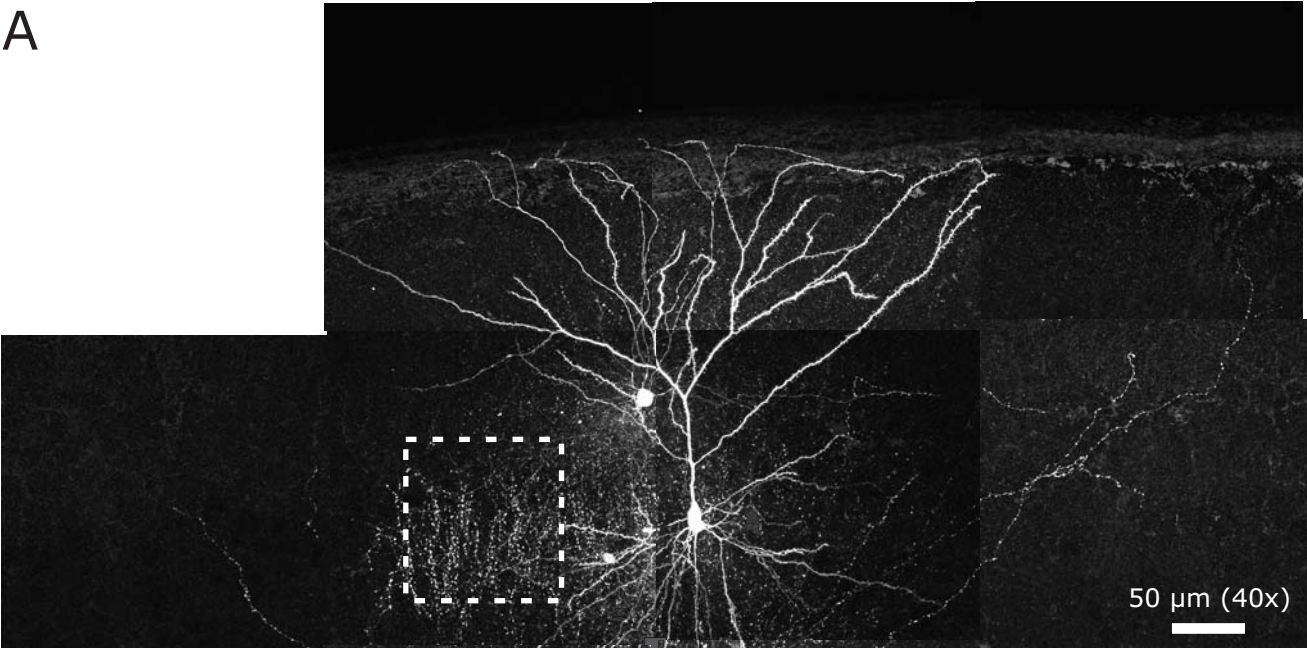

B

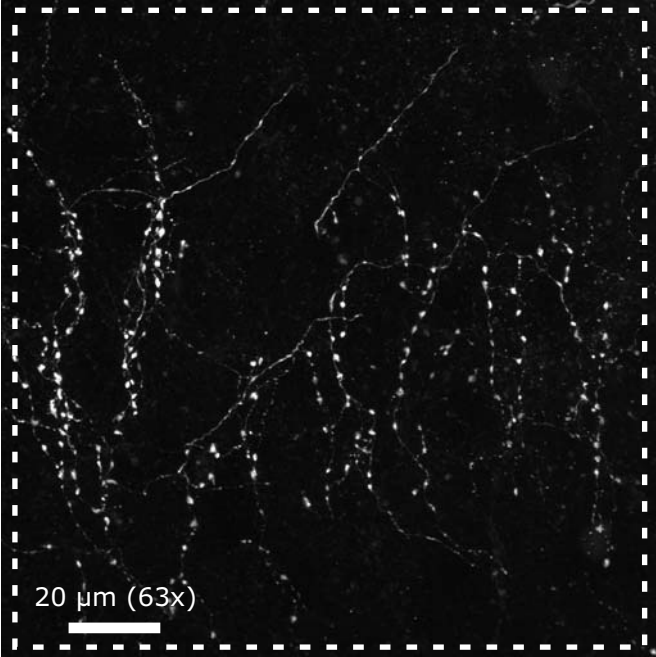



# Supplementary Figure 4

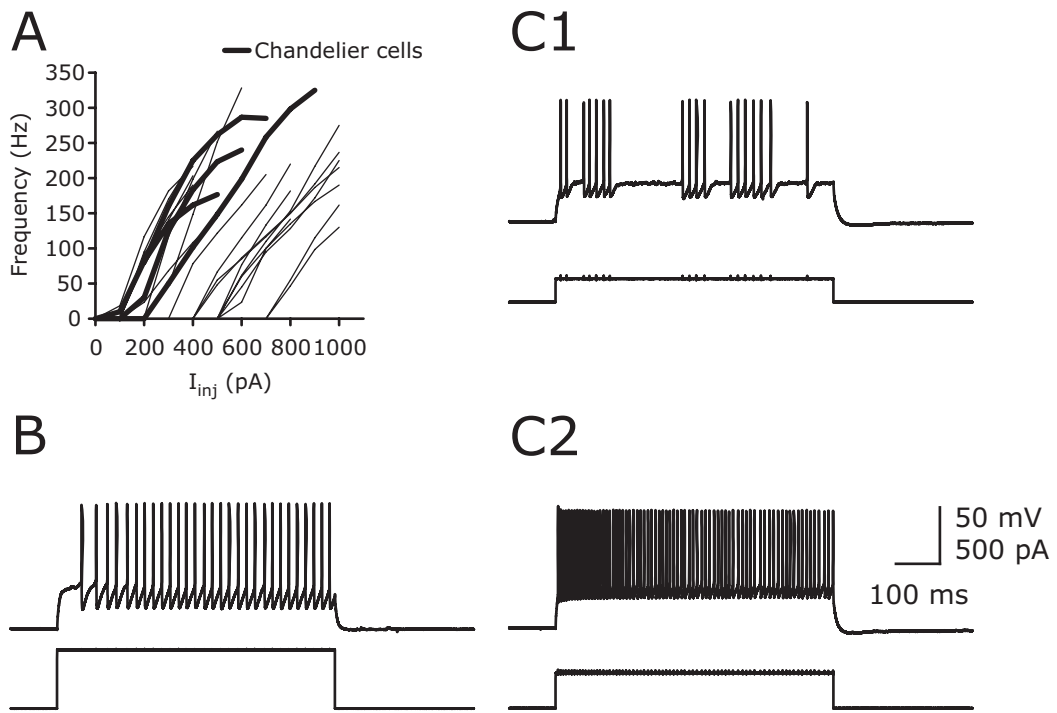

## Supplementary Figure 5

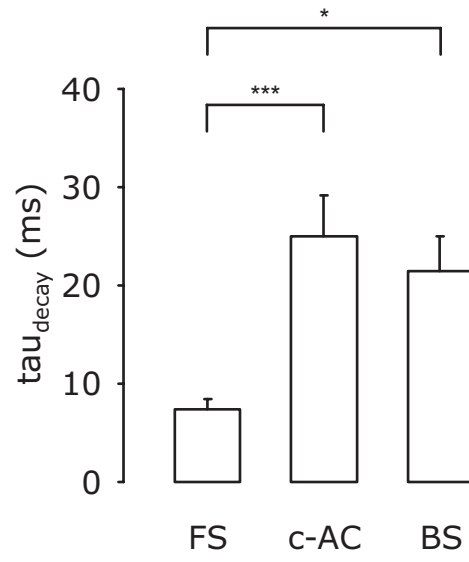

# Supplementary Figure 6

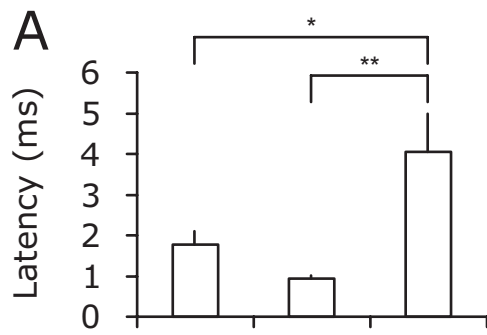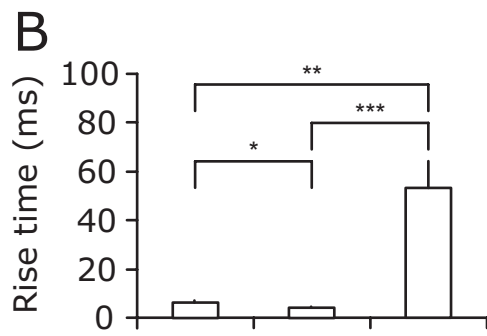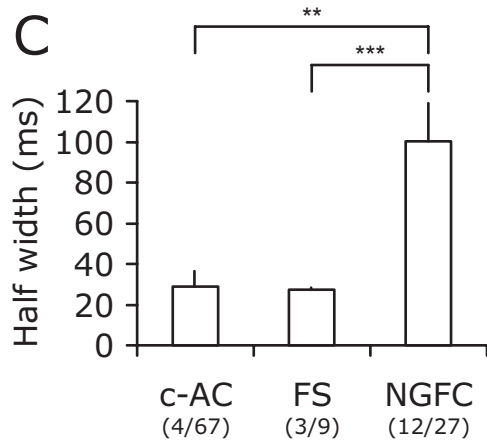

# Supplementary Figure 7

A

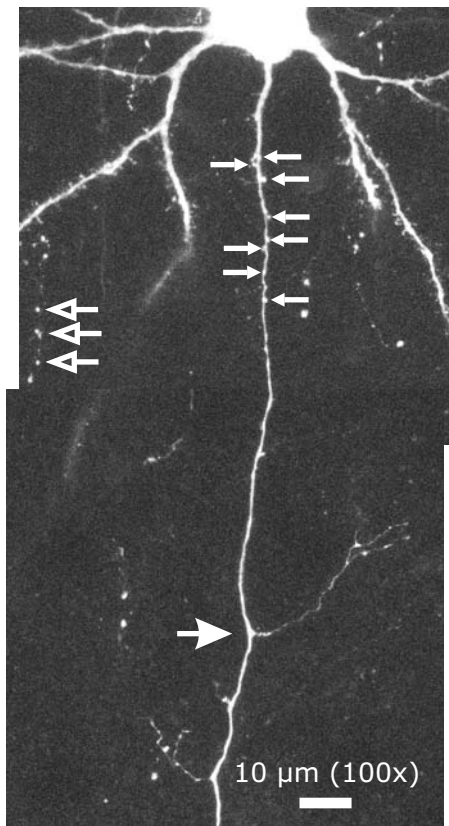

B

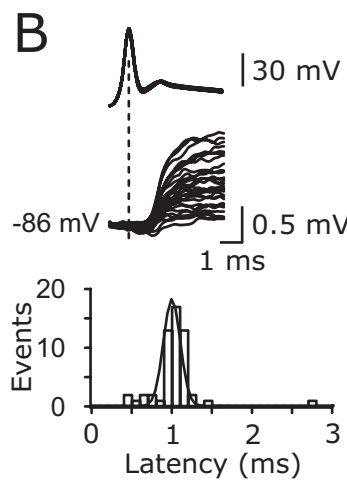

C

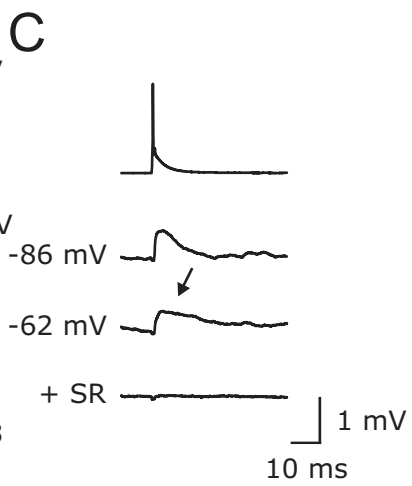

# Supplementary Figure 8

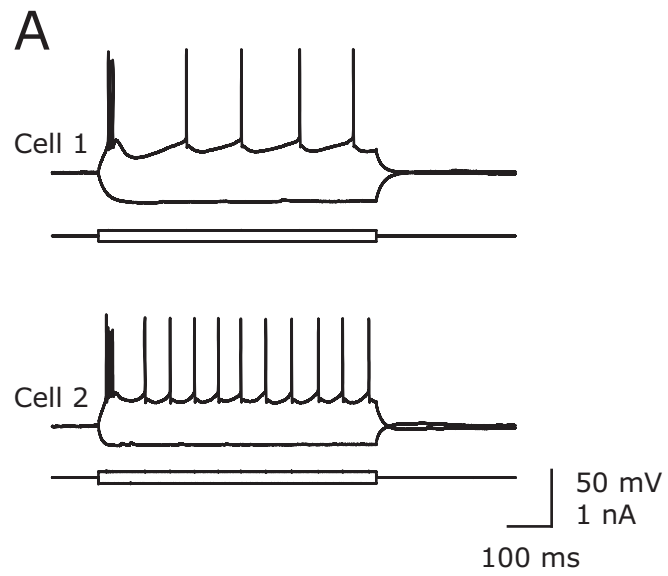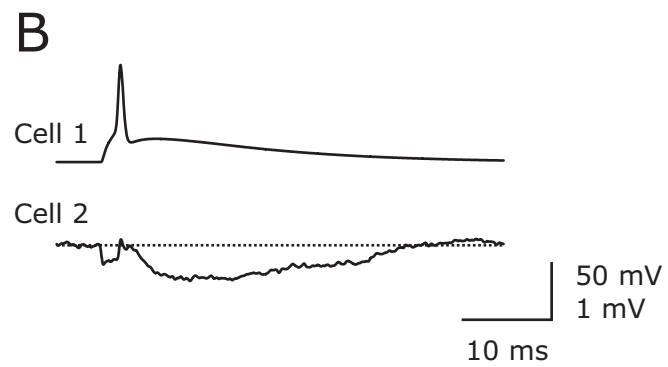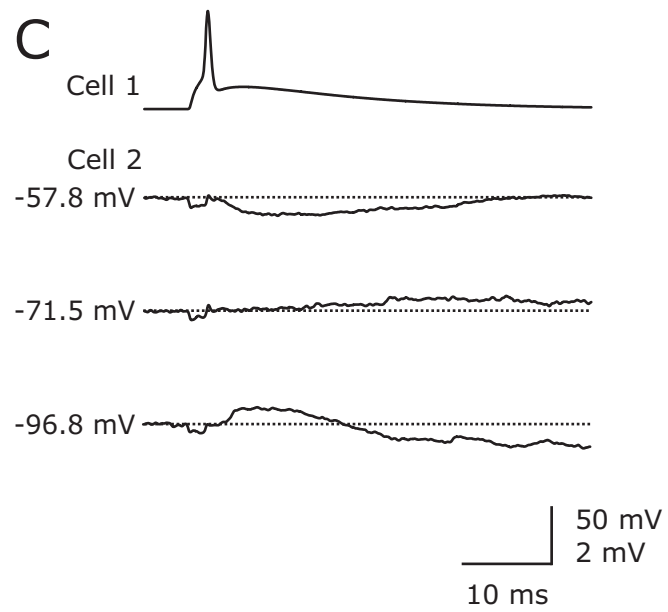

Supplement: supp_bhq257_cercor-2010-00635-File009.pdf [file supp_bhq257_cercor-2010-00635-File009.pdf]
